# Supplementary material
Source: PubMed Central journal article supplement (PMC1391974)
Supplement: NIHMS8132-supplement-Supp_Material.pdf [file NIHMS8132-supplement-Supp_Material.pdf]

## **SUPPLEMENTARY MATERIAL**

**Supplementary Figure 1:** Effect of sHsp deletion on the polyglutamine-induced toxicity in yeast. Plasmids expressing 25Q or 72Q were transformed into cells that were deleted for both Hsp26 and Hsp42.

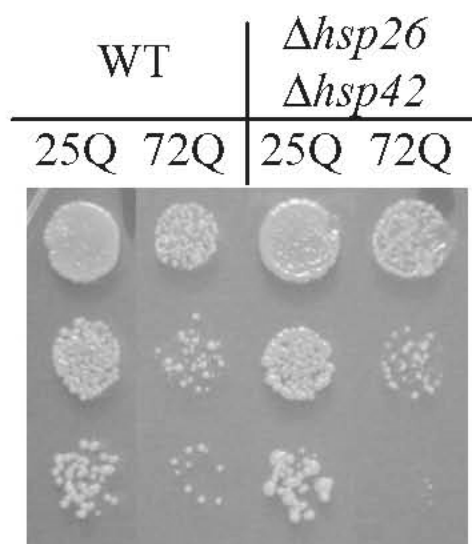

**Supplementary Figure 2:** Effect of over expression of sHsps and Hsp104 on  $\alpha$ -Synuclein-induced toxicity in yeast. Over-expression of wild-type  $\alpha$ -synuclein causes toxicity to yeast cells (27).

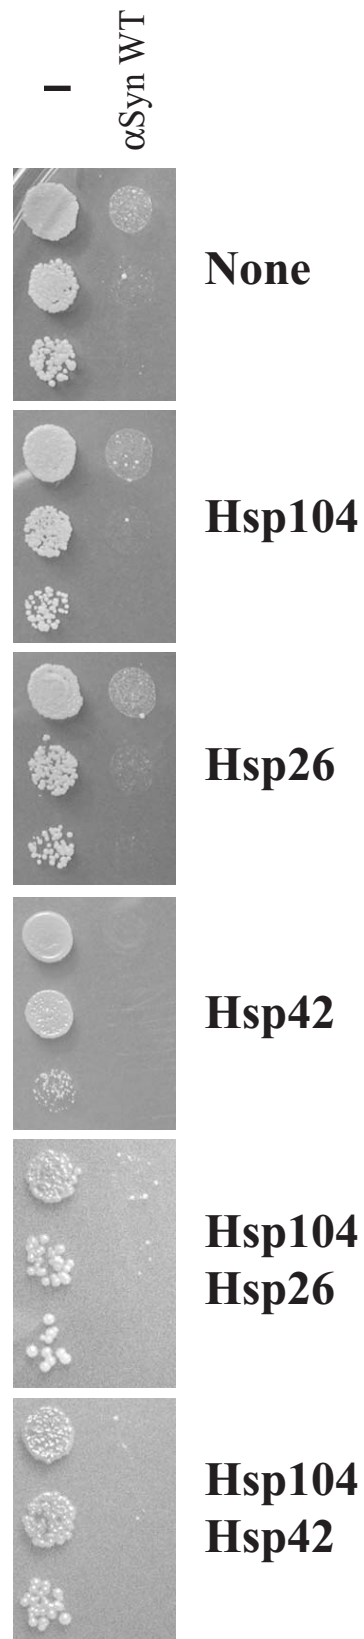

**Supplementary Table 1**

Strains used in this study

| <b>Strain Name</b> | <b>Description</b>                      | <b>Genotype</b>                                                                                                           | <b>Reference</b> |
|--------------------|-----------------------------------------|---------------------------------------------------------------------------------------------------------------------------|------------------|
| W303-1A            | Wild-type                               | <i>MATa, can1-100, his3-11,15, leu2-3,112, trp1-1, ura3-1, ade2-1</i>                                                     | (35)             |
| SL304a             | $\Delta hsp104$                         | <i>MATa, leu2-3,112 trp1-1 ura3-1 ade2-1 his3-11,15 lys2D can1-100 hsp104::LEU2</i>                                       | (36)             |
| SL327              | $\Delta hsp26$                          | <i>MATa, leu2-3,112 trp1-1 ura3-1 ade2-1 his3-11,15 lys2D can1-100 hsp26::LEU2</i>                                        | (8)              |
| AGC23              | $\Delta hsp26\Delta hsp104$             | <i>MATa, leu2-3,112 trp1-1 ura3-1 ade2-1 his3-11,15 lys2D can1-100 hsp104::LEU2, hsp26::KanMX</i>                         | This study       |
| AGC12              | $\Delta hsp42$                          | <i>MATa, can1-100, his3-11,15, leu2-3,112, trp1-1, ura3-1, ade2-1, hsp42::HygB<sup>R</sup></i>                            | This study       |
| AGC13              | $\Delta hsp42\Delta hsp104$             | <i>MATa, leu2-3,112 trp1-1 ura3-1 ade2-1 his3-11,15 lys2D can1-100 hsp104::LEU2, hsp42::HygB<sup>R</sup></i>              | This study       |
| AGC14              | $\Delta hsp26\Delta hsp42$              | <i>MATa, leu2-3,112 trp1-1 ura3-1 ade2-1 his3-11,15 lys2D can1-100 hsp26::LEU2, hsp42::HygB<sup>R</sup></i>               | This study       |
| AGC15              | $\Delta hsp26\Delta hsp42\Delta hsp104$ | <i>MATa, leu2-3,112 trp1-1 ura3-1 ade2-1 his3-11,15 lys2D can1-100 hsp26::LEU2 hsp104::KanMX, hsp42::HygB<sup>R</sup></i> | This study       |

**Supplementary Table 2**

Primers used for creating the various gene-deletion mutant strains

| Name       | Primer Sequences (5' to 3')                                               |
|------------|---------------------------------------------------------------------------|
| FdelHsp26  | CAGGTATCCAAAAAAGCAAACAAACAACTAAACAAATTAACATG<br>TCAGCTGAAGCTTCGTACGC      |
| RdelHsp26  | AATGGTCCTCGCGAGAGGGACAACACTATAGAGCCAGGTCACITTA<br>GCATAGGCCACTAGTGGATCTG  |
| V1Hsp26    | TCTGCGCACATCAATCATT                                                       |
| V2Hsp26    | ATGGGAACAGGGACAAGTCA                                                      |
| V3Hsp26    | ACGCAAATGGTGTTTTGACA                                                      |
| V4Hsp26    | GGCGCTACGTATTTCTGCAT                                                      |
| FdelHsp42  | TTGTCCATATCCCACACAAATTAAGATCATACCAAGCCGAAGCAAT<br>GAGTCGTACGCTGCAGGTTCGAC |
| RdelHsp42  | TATAAATATAAATGTATGTATGTGTGTATAAACAGATACGATATTC<br>AATTATCGATGAATTCGAGCTCG |
| V1Hsp42    | CACTAGCTTCACCTAAAAGCA                                                     |
| V2Hsp42    | CCCTCTCTGGCCAGTTTG                                                        |
| V3Hsp42    | CCCAACCCTACGGTAGAA                                                        |
| V4Hsp42    | TTTGGTTTGGGAGCGGCC                                                        |
| FdelHsp104 | CAAAGAAAAAAGAAATCAACTACACGTACCATAAAATATACAGAA<br>TATCAGCTGAAGCTTCGTACGC   |
| RdelHsp104 | CTGATTCTTGTTTCGAAAGTTTTTAAAAATCACACTATATTAATTAG<br>CATAGGCCACTAGTGGATCTG  |
| V1Hsp104   | TAGCTCAGCCGGAACCTAAA                                                      |
| V2Hsp104   | AAGGACTTTCCTCCAAAGCAT                                                     |
| V3Hsp104   | TTTGGTCATGGGTGCTGTTA                                                      |
| V4Hsp104   | TCATCGCTGTTCGAATTTTCT                                                     |
| KanB       | GGATGTATGGGCTAAATG                                                        |
| KanC       | CCTCGACATCATCTGCCC                                                        |

**Supplementary Table 3**  
Plasmids used in this study

| <b>Name</b>           | <b>Gene</b>                         | <b>Promoter</b> | <b>Replication</b> | <b>Markers</b>   | <b>Source</b>             |
|-----------------------|-------------------------------------|-----------------|--------------------|------------------|---------------------------|
| pGPD <sub>LuxAB</sub> | Bacterial luciferase fusion protein | GPD             | Cen/ARS            | His <sup>+</sup> | (13)                      |
| pGALScHsp104          | Hsp104                              | GAL1/10         | Cen/ars            | His <sup>+</sup> | (37)                      |
| pUGPDHsp26            | Hsp26                               | GPD             | 2 $\mu$            | Ura <sup>+</sup> | Vogel J & SLL unpublished |
| pHGPDHsp42            | Hsp42                               | GPD             | Cen/ars            | His <sup>+</sup> | This study                |

#### Supplementary Table 4

Identification of Hsp26 by MALDI-TOF

Peptides identified

| <b>m/z submitted</b> | <b>MH+ matched</b> | <b>Delta ppm</b> | <b>Start</b> | <b>End</b> | <b>Peptide sequence</b>   |
|----------------------|--------------------|------------------|--------------|------------|---------------------------|
| 814.5                | 814.4787           | 26.1797          | 24           | 31         | LLGEGGLR                  |
| 842.5                | 842.4736           | 31.3460          | 38           | 45         | QLANTPAK                  |
| 1274.6               | 1274.6017          | -1.3381          | 118          | 127        | DIDIEYHQNK                |
| 1330.7               | 1330.6967          | 2.5035           | 38           | 50         | QLANTPAKDSTGK             |
| 1363.6               | 1363.6494          | -36.2146         | 203          | 214        | KIEVSSQESWGN              |
| 1402.7               | 1402.6967          | 2.3750           | 117          | 127        | KDIDIEYHQNK               |
| 1461.8               | 1461.7953          | 3.2015           | 177          | 190        | ADYANGVLTTLVTPK           |
| 1729.9               | 1729.9012          | -0.7178          | 161          | 176        | VITLPDYPGVDADNIK          |
| 1805.9               | 1805.8935          | 3.6154           | 51           | 66         | EVARPNNYAGALYDPR          |
| 1958.0               | 1958.0082          | -4.2013          | 128          | 145        | NQILVSGEIPSTLNEESK        |
| 2041.0               | 2041.0242          | -11.8620         | 90           | 107        | SVAVPVDILDHDNNYELK        |
| 2201.1               | 2201.1301          | -13.6894         | 128          | 147        | NQILVSGEIPSTLNEESKDK      |
| 2690.2               | 2690.2051          | -1.8914          | 67           | 89         | DETLDDWFDNDLSLFPSTGFGFPR  |
| 2698.2               | 2698.1850          | 5.5514           | 1            | 23         | SFNSPFFDFFDNINNEVDAFNR    |
| 2719.5               | 2719.4671          | 12.1138          | 90           | 114        | SVAVPVDILDHDNNYELKVVVPGVK |

Sequence of Hsp26 showing the peptides identified (colored red). Vertical lines show trypsin cleavage sites.

SFNSPFFDFFDNINNEVDAFNR|LLGEGGLR|GYAPRR|QLANTPAK|DSTGK|EVARPNNYAGALYDPR|DETLDDWFDNDLSLFPSTGFGFPR|SVAVPVDILDHDNNYELK|VVVPGVK|SK|K|DIDIEYHQNK|NQILVSGEIPSTLNEESK|DK|VKVKESSSGKFKR|VITLPDYPGVDADNIK|ADYANGVLTTLVTPK|LKPQKDGKNHVK|KIEVSSQESWGN

**Protein coverage:** 180/214 = 84.1% by amino acid count



**Supplementary Table 5**

Structural properties of Hsp26:FFL complexes. Details of the experiment are provided in the legend to Figure 6. MW is molecular weight predicted assuming that the particles are spheres. %PD indicates polydispersity.

| <b>Sample</b>                                 | <b>Temperature</b>          | <b>Radius (nm)</b> | <b>Diameter (nm)</b> | <b>MW (kDa)</b> | <b>% PD</b> |
|-----------------------------------------------|-----------------------------|--------------------|----------------------|-----------------|-------------|
| 0.42 $\mu$ M Hsp26 oligomer                   | 25°C                        | 8.7                | 17.4                 | 532             | 31.0        |
|                                               | 45°C/10' $\rightarrow$ 25°C | 10.1               | 20.2                 | 758             | 44.2        |
| 0.42 $\mu$ M Hsp26 oligomer + 0.1 $\mu$ M FFL | 25°C                        | 8.7                | 17.4                 | 538             | 31.9        |
|                                               | 45°C/10' $\rightarrow$ 25°C | 16.7               | 33.4                 | 2427            | 68.2        |
| 0.42 $\mu$ M Hsp26 oligomer + 1 $\mu$ M FFL   | 25°C                        | 9.1                | 18.2                 | 585             | 28.8        |
|                                               | 45°C/10' $\rightarrow$ 25°C | 33.2               | 66.4                 | 12228           | 35.8        |
